# Supplementary material
Source: HighWire-hosted journal article supplement (https://diabetes.diabetesjournals.org/content/suppl/2008/01/10/db07-0839)
Supplement: db070839SupplementalData.pdf [file db070839SupplementalData.pdf]

| <i>gene</i>    | <i>forward 5'-3'</i>                     | <i>reverse 3'-5'</i>                            | <i>probe 5'-3'</i>                  | <i>annealing-<br/>temperature<br/>(°C)</i> |
|----------------|------------------------------------------|-------------------------------------------------|-------------------------------------|--------------------------------------------|
| h18s           | TTCCAATTA<br>CAGGGCCT<br>CGA             | CCTGAGAAAC<br>GGCTACCACA<br>T                   | CGCAAATTAC<br>CCACTCCCGA<br>CCC     | 60                                         |
| hCPT1a         | TGCTTTACA<br>GGCGCAAA<br>CTG             | TGGAATCGTG<br>GATCCCAA<br>AATCAAACCA<br>ATTCGTC | ACCGGGAGGA<br>AATCAAACCA<br>ATTCGTC | 60                                         |
| hPPAR $\alpha$ | CTGCAAGG<br>GCTTCTTTC<br>GG              | AATCGCGTTG<br>TGTGTGACAT<br>CC                  |                                     | 68                                         |
| m18s           | TTAATGAGC<br>CATTCGCA<br>GTTTTTC         | ACCTGGTTGA<br>TCCTGCCAGT<br>AG                  | TGCATGTCTA<br>AGTACGCACG<br>GCCGT   | 60<br>(semi 67,3)                          |
| mAcsl1         | CTCACCAC<br>CTTCTGGTA<br>TGC             | AGCCATCGTA<br>CATGGTTCTG                        | TGGAAATAGC<br>GGGTACCACT<br>GATGGT  | 63                                         |
| mCpt1a         | CGCACGGA<br>AGGAAAAT<br>GG               | TGTGCCCAAT<br>ATTCCTGG                          |                                     | 65                                         |
| mCpt1b         | CAAGTTCAG<br>AGACGAAC<br>GCC             | TCAAGAGCTG<br>TTCTCCGAAC<br>TG                  |                                     |                                            |
| mPPAR $\alpha$ | GAAGGGCA<br>CACGCGTG<br>CGAGTTTTTC<br>AG | CTGTGATGAC<br>AACGTCTTGT<br>TCCCGAACT           |                                     | 72                                         |
| mCd36          | GATTAATGG<br>CACAGACG<br>CAGC            | TCCGAACACA<br>GCGTAGATAG<br>ACC                 |                                     | 60                                         |

|                  |           |            |    |
|------------------|-----------|------------|----|
| mPPAR $\gamma$ 2 | TCTGGGAG  | GGTGGGCCA  | 60 |
|                  | ATTCTCCTG | GAATGGCATC |    |
|                  | TTGA      | T          |    |
| hPPAR $\alpha$   | CTGTCGGG  | TAGGAGAGTC | 60 |
| (siRNA           | ATGTCACAC | CTTTCCGGTC |    |
| experiment)      | AAC       |            |    |
